# Supplementary material for: Acteoside as a potential therapeutic option for primary hepatocellular carcinoma: a preclinical study
Source: BMC Cancer. 2020 Sep 29;20:936. doi: 10.1186/s12885-020-07447-3 (PMC7526186; doi:10.1186/s12885-020-07447-3)

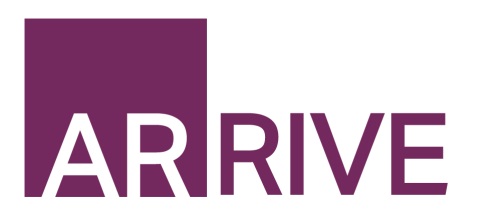


The ARRIVE Guidelines Checklist

Animal Research: Reporting In Vivo Experiments

Carol Kilkenny1, William J Browne2, Innes C Cuthill3, Michael Emerson4 and Douglas G Altman5

*1The National Centre for the Replacement, Refinement and Reduction of Animals in Research, London, UK, 2School of Veterinary Science, University of Bristol, Bristol, UK, 3School of Biological Sciences, University of Bristol, Bristol, UK, 4National Heart and Lung Institute, Imperial College London, UK, 5Centre for Statistics in Medicine, University of Oxford, Oxford, UK.*

|  | | ITEM | RECOMMENDATION | Section/ Paragraph |
| --- | --- | --- | --- | --- |
| 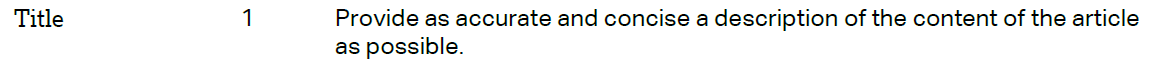 | | | Title, Paragraph 1 |
| 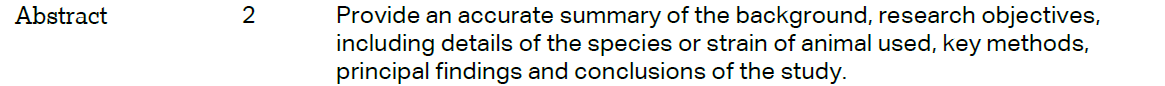 | | | Abstract, Paragraphs 1-4 |
| INTRODUCTION | | |  |
| 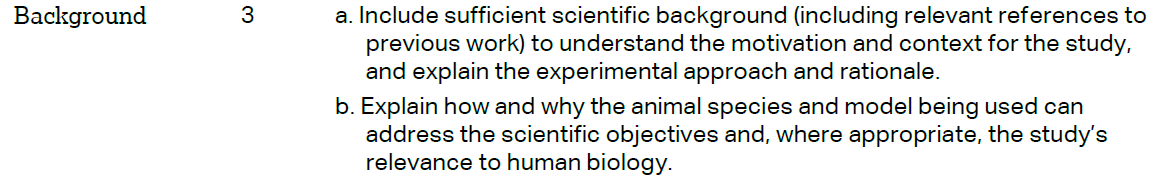 | | | Background, Paragraphs 1-3 |
| 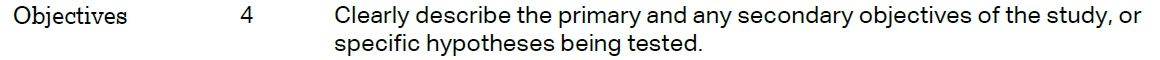 | | | Background, Paragraphs 1-2 |
| METHODS | | |  |
| 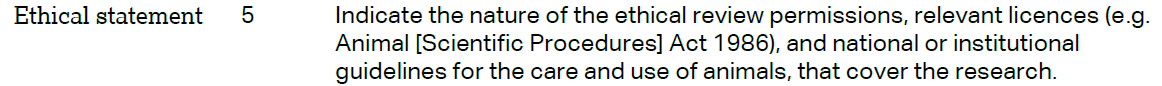 | | | Methods, Paragraph 3 |
| 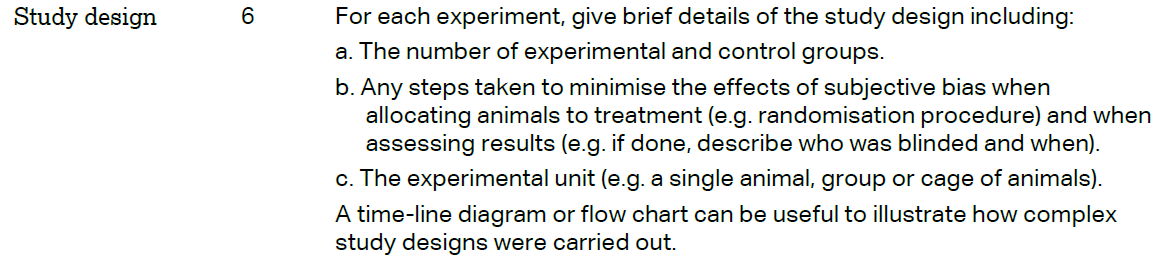 | | | Methods, Paragraph 10;  Figures 5 and 6 with the legends. |
| 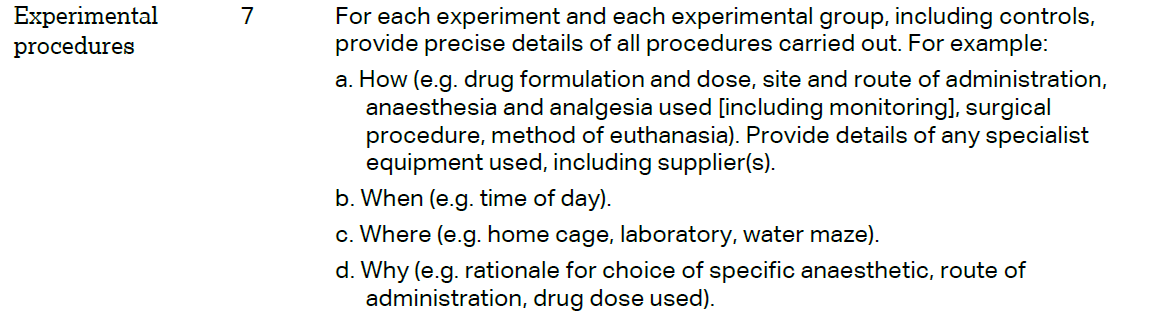 | | | Methods, Paragraph 10. |
| 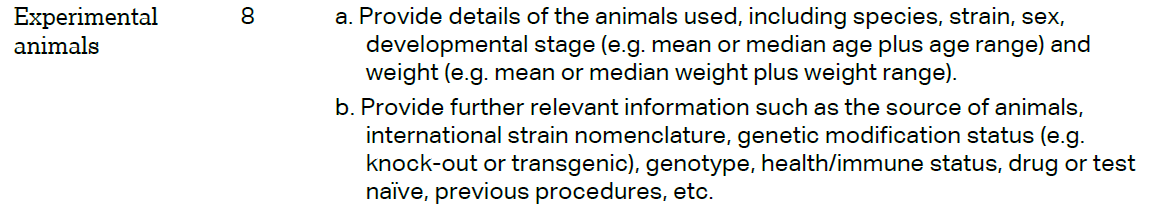 | | | Methods, Paragraph 3. |

The ARRIVE guidelines. Originally published in *PLoS Biology*, June 20101

| 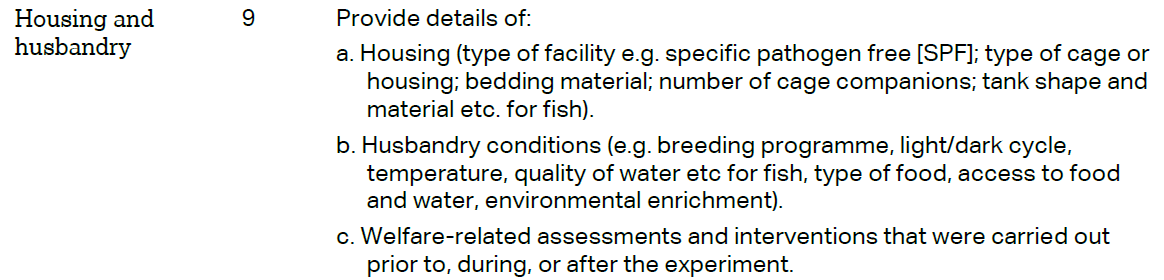 | Methods, Paragraph 3 | |
| --- | --- | --- |
| 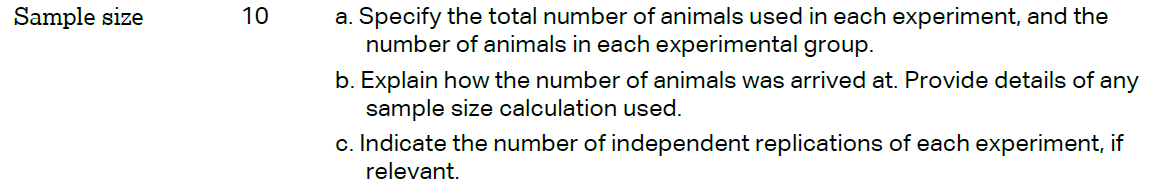 | Methods, Paragraph 10; | |
| 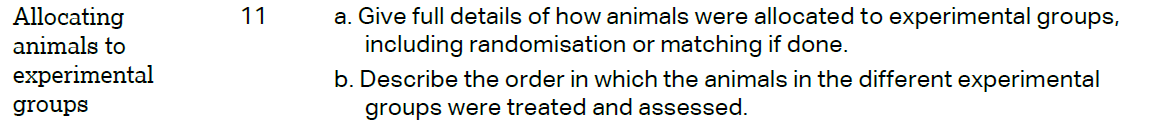 | Methods, Paragraph 10; | |
| 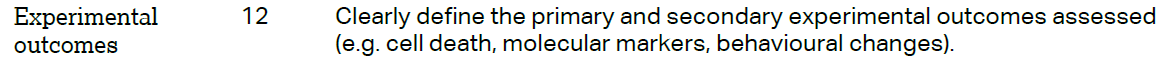 | Methods, Paragraph 10; | |
| 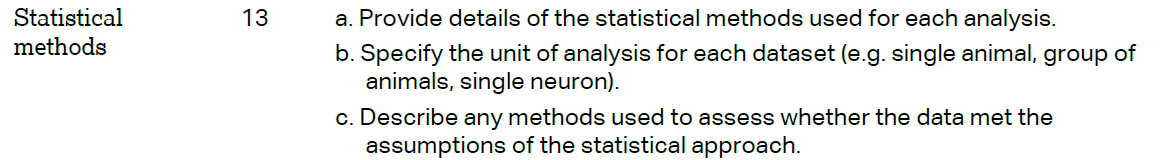 | Methods, Paragraph 11 | |
| RESULTS |  | |
| 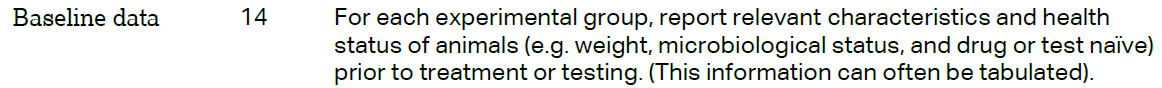 | Methods, Paragraph 10; | |
| 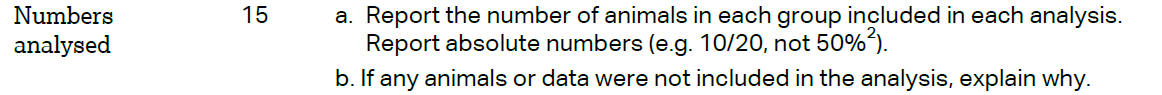 | Figures 5 and 6 and the legends | |
| 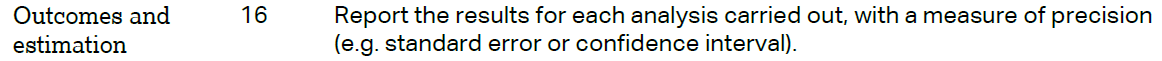 | Results, paragraph 4; Figures 5 and 6 and the legends | |
| 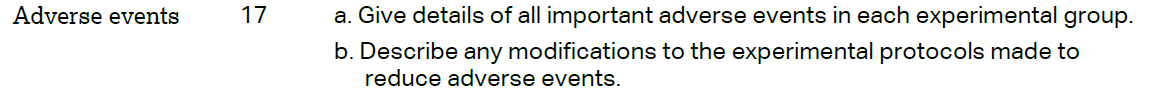 | N/A | |
| DISCUSSION |  | |
| 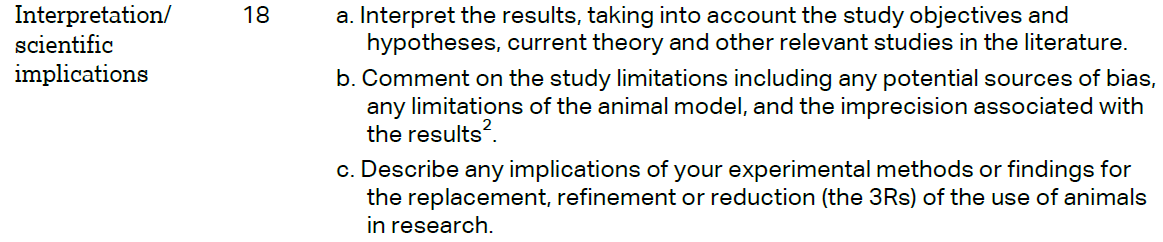 | Discussion, paragraphs 1, 2 and 4 | |
| 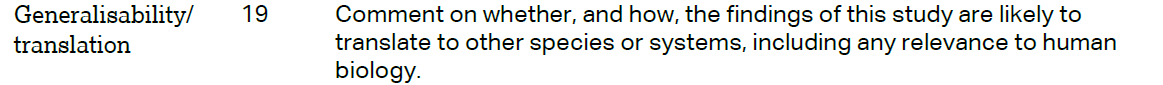 | Discussion, paragraphs 1 and 2. | |
| 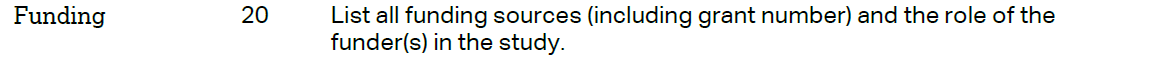 | | Declarations, paragraph 5 |


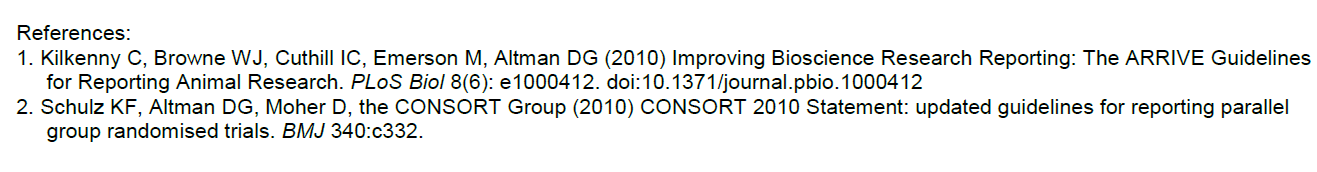

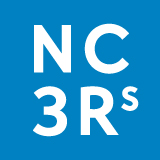

Supplement: Supplementary file 2 — Additional file 2. [file 12885_2020_7447_MOESM2_ESM.docx]
